# Supplementary material for: Ex Vivo Oncolytic Virotherapy with Myxoma Virus Arms Multiple Allogeneic Bone Marrow Transplant Leukocytes to Enhance Graft versus Tumor
Source: PubMed Central journal article supplement (PMC5363758; doi:10.1016/j.omto.2016.12.002), 2016-12-14
Supplement: mmc1.pdf [file mmc1.pdf]

**OMTO, Volume 4**

**Supplemental Information**

**Ex Vivo Oncolytic Virotherapy with Myxoma Virus**

**Arms Multiple Allogeneic Bone Marrow Transplant**

**Leukocytes to Enhance Graft versus Tumor**

**Cameron L. Lilly, Nancy Y. Villa, Ana Lemos de Matos, Haider M. Ali, Jess-Karan S. Dhillon, Tom Hoffland, Masmudur M. Rahman, Winnie Chan, Bjarne Bogen, Christopher Cogle, and Grant McFadden**

## SUPPLEMENTARY MATERIAL

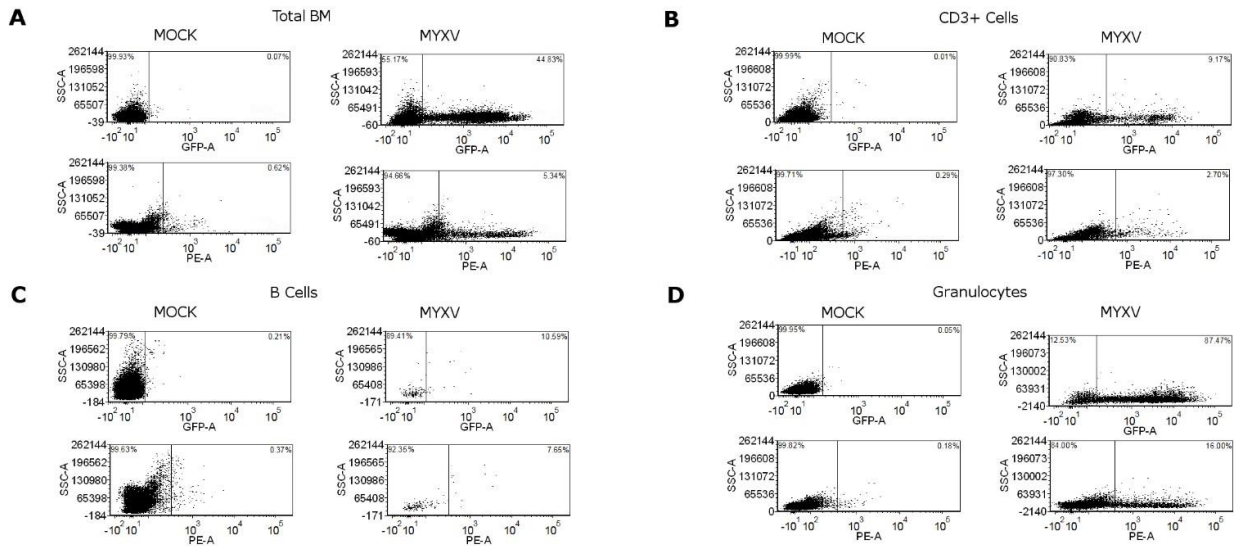

**Figure S1. Expression of late viral genes by different murine bone marrow cell types**

To determine the proportion of infected GFP<sup>+</sup> cells that become TdTomato positive (indicating the progression to late viral gene expression), murine bone marrow was infected with vMyxGFP/TdTomato at MOI of 10. Panel (a) represents whole BM. BM-derived T cells (b) were analyzed by CD3 staining. Within the infected BM, B cells were identified by B220/CD19 staining (c), and granulocytes were identified as being CD11b<sup>+</sup>/Ly-6B.2<sup>+</sup>/Ly-6G<sup>hi</sup> (d).

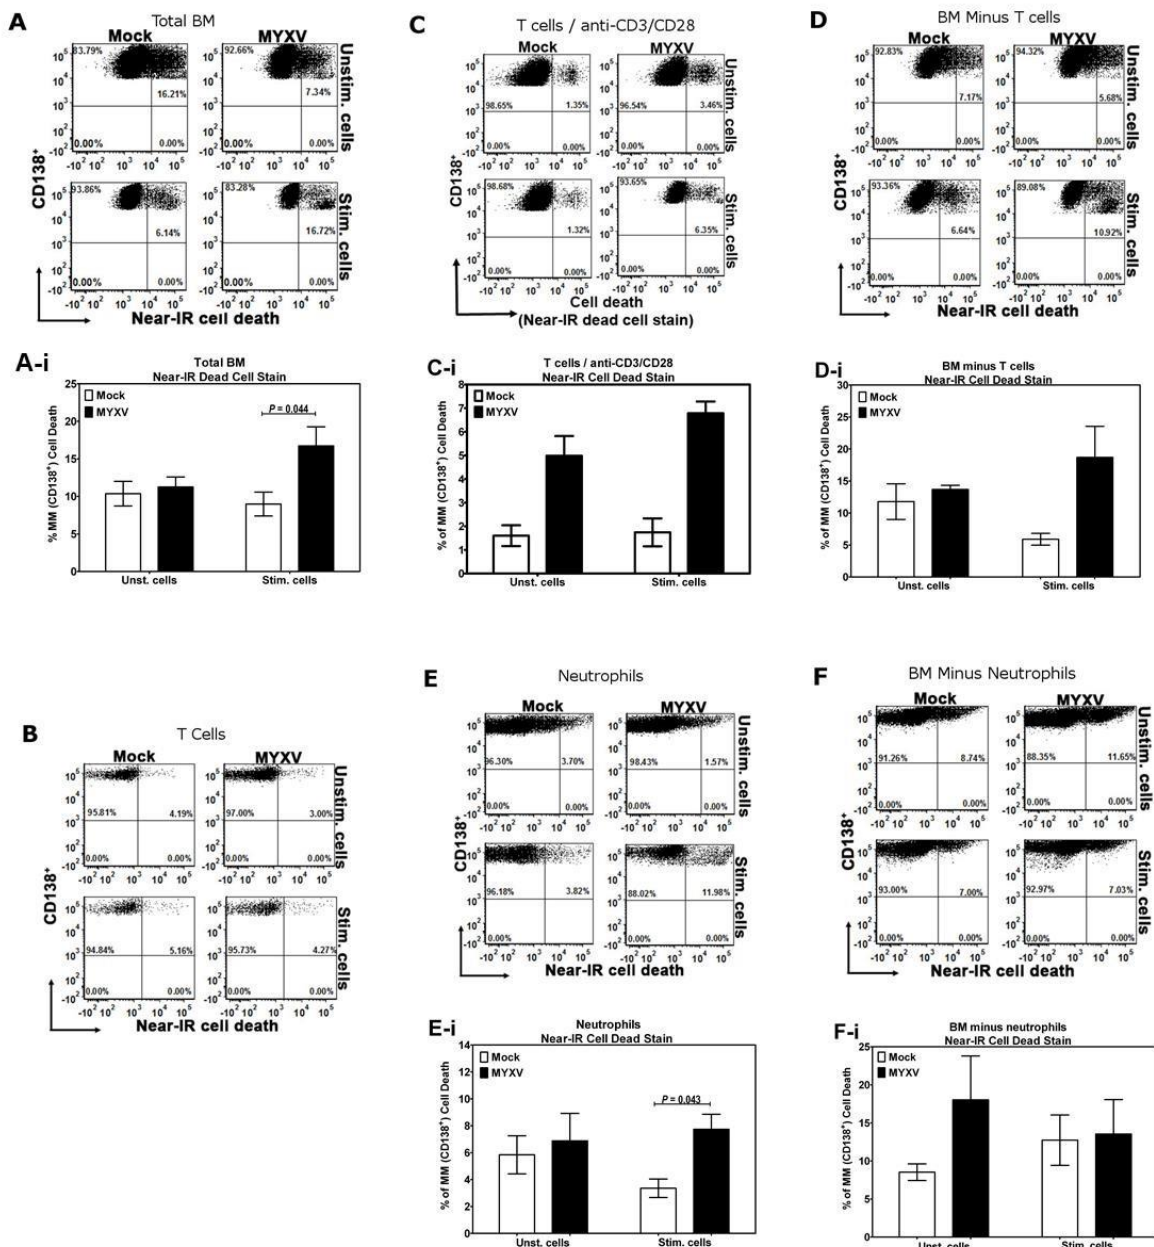

**Figure S2. MOPC315.BM cell death induced by effector cells armed with myxoma virus**

NearIR Live/Dead® staining and flow cytometric analysis were performed on MLRs combining mock- or MYXV-treated, unstimulated or stimulated C57BL/6 BM-derived cells (effector) with MOPC315.BM DsRed (target) at a ratio of 10:1. MLRs were performed with whole BM (**a** and **a-i**), negatively selected T cells (**b**, **c** and **c-i**), or T cell depleted cell fraction (**d** and **d-i**),

negatively selected neutrophils (**e and e-i**), and neutrophil depleted (**f and f-i**). The mean of at least three independent experiments is shown as the height of the bar and error bars represent the Standard Error (SE). *P* values were determined using the Student's *t*-test. A *P* value of less than 0.05 was considered statistically significant.

## **SUPPLEMENTAL METHODS**

### ***Progression of virus infection of different murine bone marrow cell types***

Levels of expression of late viral genes was performed using vMyx-GFP/TdTomato recombinant virus. In brief BM from C57BL/6 mice was infected with vMyx-GFP (Early/Late promoter)TdTomato (Late promoter) at an MOI of 10 for 12 hr. After blocking with mouse-specific FcR reagent, (Miltenyi Biotec Inc., San Diego, CA), cells were stained with antibodies against anti-Ly-6B.2-Alexa Fluor® 700 (Bio-Rad, Hercules, CA), anti-CD11b-APC, anti-Ly-6G Pacific Blue, anti-B220-APC, anti-CD19-Pacific Blue, anti-CD3-APC/Cy7 and analyzed using flow cytometry for GFP<sup>+</sup> or PE<sup>+</sup> cells. Isotype controls were used accordingly: Alexa Fluor® 700 Rat IgG2a, κ (clone RTK2758), APC Rat IgG2a, κ (clone RTK2758), APC Rat IgG2b, κ (clone RTK4530), APC/Cy7 Rat IgG2b, κ (clone RTK4530), APC/Cy7 Rat IgG2c, κ (clone RTK4174), Pacific Blue Rat IgG2a, κ (clone RTK2758). AbCTM anti-Rat/Hamster Bead kit (Molecular Probes™, Thermo Fisher Scientific, Waltham, MA) was used for single color compensation.

### ***Assessment of MOPC315.BM cell death induced by effector cells armed with myxoma virus***

Sample viability was assessed using the Live/Dead® Fixable Blue Dead Cell Stain kit, for UV excitation or Live/Dead® Fixable Near-IR Dead Cell Stain Kit, for excitation with 633 or

635 nm (Molecular Probes™, Thermo Fisher Scientific, Waltham, MA). FcR blocking was performed with mouse specific FcR reagent (Miltenyi Biotec Inc., San Diego, CA). Cells were then stained with anti-CD138-PerCP/Cy5.5 antibody (BioLegend, San Diego, CA) or with the isotype control PerCP/Cy5.5 Rat IgG2b,  $\kappa$  (clone RTK4530) (BioLegend, San Diego, CA). AbCTM anti-Rat/Hamster Bead kit (Molecular Probes™, Thermo Fisher Scientific, Waltham, MA) was used for single color compensation. Levels of CD138 cell death were quantified using flow cytometry.
